# Supplementary material for: An approach to structural facial rejuvenation with fillers in women
Source: PubMed Central journal article supplement — Int J Womens Dermatol. 2018 Dec 13;5(1):52–67. doi: 10.1016/j.ijwd.2018.08.011 (PMC6374711; doi:10.1016/j.ijwd.2018.08.011), 2018-12-13
Supplement: mmc2.pdf [file mmc2.pdf]

I own the copyright to this image and with this writing grant permission for reproduction of the image published as Figure 1 in Surek C, Vargo J, Lamb J. Deep Pyriform Space: Anatomical Clarifications and Clinical Implications. Plast. Reconstr. Surg. 138: 59, 2016. in the following publication:

Title: An Approach to Structural Rejuvenation with Fillers in Women

Publisher: Elsevier

Author: Rebecca Fitzgerald MD

Expected publication date: Dec 2018

Thank you,

A handwritten signature in black ink that reads "James D Vargo". The signature is written in a cursive style with a large, stylized initial "J" and "V".

James D Vargo MD
