# Supplementary material for: An approach to structural facial rejuvenation with fillers in women
Source: PubMed Central journal article supplement — Int J Womens Dermatol. 2018 Dec 13;5(1):52–67. doi: 10.1016/j.ijwd.2018.08.011 (PMC6374711; doi:10.1016/j.ijwd.2018.08.011), 2018-12-13
Supplement: mmc3.pdf [file mmc3.pdf]

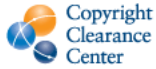

[MyOrders](#) > [Orders](#) > [All Orders](#)

## Order Details

### Latest Comment:

Dear Jose,

Thank you for contacting Wolters Kluwer.

The author of the article has retained copyright for the figure requested. Since we are not the copyright holders for this content, permission can not be granted via this service. Please refer to

(Photographs courtesy of Val Lambros, M.D.)

This ticket will be closed.

Kind Regards,  
Camille Underdue  
Wolters Kluwer Permissions

[Previous Comments](#)

[Print](#) [Contact Publisher](#) [Edit Order](#)

|                                                        |                                                                                                                                                  |
|--------------------------------------------------------|--------------------------------------------------------------------------------------------------------------------------------------------------|
| <a href="#">Order Number</a>                           | 501412922                                                                                                                                        |
| <a href="#">Order Date</a>                             | Jul 09, 2018                                                                                                                                     |
| <a href="#">Licensed Content Publisher</a>             | Wolters Kluwer Health, Inc.                                                                                                                      |
| <a href="#">Licensed Content Publication</a>           | Plastic and Reconstructive Surgery                                                                                                               |
| <a href="#">Licensed Content Title</a>                 | Three-Dimensional Facial Averaging: A Tool for Understanding Facial Aging                                                                        |
| <a href="#">Licensed Content Author</a>                | Val Lambros and Gideon Amos                                                                                                                      |
| <a href="#">Licensed Content Date</a>                  | Dec 1, 2016                                                                                                                                      |
| <a href="#">Licensed Content Volume</a>                | 138                                                                                                                                              |
| <a href="#">Licensed Content Issue</a>                 | 6                                                                                                                                                |
| <a href="#">Type of Use</a>                            | Journal/Magazine                                                                                                                                 |
| <a href="#">Requestor type</a>                         | STM Signatory Publisher                                                                                                                          |
| <a href="#">STM publisher name</a>                     | Elsevier                                                                                                                                         |
| <a href="#">Format</a>                                 | Print and electronic                                                                                                                             |
| <a href="#">Portion</a>                                | Figures/table/illustration                                                                                                                       |
| <a href="#">Number of figures/tables/illustrations</a> | 1                                                                                                                                                |
| <a href="#">Figures/tables/illustrations used</a>      | fig 1                                                                                                                                            |
| <a href="#">Author of this Wolters Kluwer article</a>  | No                                                                                                                                               |
| <a href="#">Will you be translating?</a>               | No                                                                                                                                               |
| <a href="#">Title of the content</a>                   | An approach to structural facial rejuvenation with fillers in women                                                                              |
| <a href="#">Publication the new content is in</a>      | International Journal of Women's Dermatology                                                                                                     |
| <a href="#">Publisher of your content</a>              | Elsevier                                                                                                                                         |
| <a href="#">Author of the content</a>                  | Rebecca Fitzgerald MD                                                                                                                            |
| <a href="#">Expected publication date</a>              | Dec 2018                                                                                                                                         |
| <a href="#">Estimated size of content (pages)</a>      | 10                                                                                                                                               |
| <a href="#">Requestor Location</a>                     | Rebecca Fitzgerald MD Inc<br>321 N Larchmont Blvd<br>906<br><br>LOS ANGELES, CA 90004<br>United States<br>Attn: JOSE MARIO CORNEJO<br>13-2932696 |
| <a href="#">Publisher Tax ID</a>                       | <b>Not Available</b>                                                                                                                             |
| <a href="#">Total</a>                                  |                                                                                                                                                  |

[BACK](#)
