# Supplementary material for: An approach to structural facial rejuvenation with fillers in women
Source: PubMed Central journal article supplement — Int J Womens Dermatol. 2018 Dec 13;5(1):52–67. doi: 10.1016/j.ijwd.2018.08.011 (PMC6374711; doi:10.1016/j.ijwd.2018.08.011), 2018-12-13
Supplement: mmc6.pdf [file mmc6.pdf]

# GEORG THIEME VERLAG KG LICENSE TERMS AND CONDITIONS

Jul 30, 2018

This Agreement between Rebecca Fitzgerald MD Inc -- JOSE CORNEJO ("You") and Georg Thieme Verlag KG ("Georg Thieme Verlag KG") consists of your license details and the terms and conditions provided by Georg Thieme Verlag KG and Copyright Clearance Center.

|                                    |                                                                                                                                    |
|------------------------------------|------------------------------------------------------------------------------------------------------------------------------------|
| License Number                     | 4384980800342                                                                                                                      |
| License date                       | Jul 09, 2018                                                                                                                       |
| Licensed Content Publisher         | Georg Thieme Verlag KG                                                                                                             |
| Licensed Content Publication       | Facial Plastic Surgery                                                                                                             |
| Licensed Content Title             | The Anatomy of the Aging Face: A Review                                                                                            |
| Licensed Content Author            | Sebastian Cotozana, Alina A. M. Fratila, Thilo L. Schenck, Wolfgang Redka-Swoboda, Isaac Zilinsky, Tatjana Pavicic                 |
| Licensed Content Date              | Jan 1, 2016                                                                                                                        |
| Licensed Content Volume            | 32                                                                                                                                 |
| Licensed Content Issue             | 03                                                                                                                                 |
| Type of Use                        | Journal/Magazine/Newspaper                                                                                                         |
| Requestor type                     | STM publisher OR author publishing with an STM publisher                                                                           |
| The intended publisher of new work | Elsevier                                                                                                                           |
| Format                             | print and electronic                                                                                                               |
| Portion                            | figures/tables/images                                                                                                              |
| Number of figures/tables/images    | 1                                                                                                                                  |
| Will you be translating?           | no                                                                                                                                 |
| Distribution quantity              | 500                                                                                                                                |
| Specified additional information   | reuse figure as originally shown as a reference. Using Figure 1                                                                    |
| Order reference number             |                                                                                                                                    |
| Title of the article               | An approach to structural facial rejuvenation with fillers in women                                                                |
| Publication the new article is in  | International Journal of Women's Dermatology                                                                                       |
| Publisher of the article           | Elsevier                                                                                                                           |
| Author of new article              | Rebecca Fitzgerald MD                                                                                                              |
| Expected publication date          | Dec 2018                                                                                                                           |
| Requestor Location                 | Rebecca Fitzgerald MD Inc<br>321 N Larchmont Blvd<br>906<br><br>LOS ANGELES, CA 90004<br>United States<br>Attn: JOSE MARIO CORNEJO |
| Publisher Tax ID                   | 13-5650435                                                                                                                         |
| Billing Type                       | Invoice                                                                                                                            |
| Billing Address                    | Rebecca Fitzgerald MD Inc<br>321 N Larchmont Blvd                                                                                  |

LOS ANGELES, CA 90004  
United States  
Attn: JOSE MARIO CORNEJO

Total

**0.00 USD**

[Terms and Conditions](#)

## Terms and Conditions

### Introduction

The publisher for this copyrighted material is **Georg Thieme Verlag KG**, in the following referred to as **Publisher**. By clicking "accept" in connection with completing this licensing transaction, you agree that the following terms and conditions apply to this transaction (along with the Billing and Payment terms and conditions established by Copyright Clearance Center, Inc. ("CCC"), at the time that you opened your CCC account and that are available at any time at <<http://myaccount.copyright.com>>).

### Limited License

Publisher hereby grants to you a non-exclusive license to use this material. Licenses are for one-time use only with a maximum distribution equal to the number specified in the license. The first instance of republication or reuse granted by this license must be completed within 12 months of the date this license was granted (although copies prepared before the end date may be distributed thereafter).

Licences for reuse in a **dissertation/thesis** are limited to the depository copies (non-profit and password-protected) that have to be delivered within the university system. Any further use and follow-up publications require separate permission.

If you are **the author requesting full use of your article** in an Institutional Repository, special rules apply. For more detailed information, please check <https://www.thieme.de/de/autorenounge/Autorenounge-Zeitschriftenautoren-Autorenrechte-95029.htm>

If you have identified yourself as a signatory to the **STM Permissions Guidelines**, permission is given according to the current version of these Guidelines (<https://www.stm-assoc.org/copyright-legal-affairs/permissions/permissions-guidelines/>).

### Geographic Rights: Scope

Licenses may be exercised anywhere in the world.

### Altering/Modifying Material: Not Permitted

You may not alter or modify the material in any manner (except that you may use, within the scope of the license granted, one or more excerpts from the copyrighted material, provided that the process of excerpting does not alter the meaning of the material or in any way reflect negatively on the publisher or any writer of the material), nor may you translate the material into another language.

### Reservation of Rights

Publisher reserves all rights not specifically granted in the combination of (i) the license details provided by you and accepted in the course of this licensing transaction, (ii) these terms and conditions and (iii) CCC's Billing and Payment terms and conditions.

### License Contingent on Payment

While you may exercise the rights licensed immediately upon issuance of the license at the end of the licensing process for the transaction, provided that you have disclosed complete and accurate details of your proposed use, no license is finally effective unless and until full payment is received from you (either by publisher or by CCC) as provided in CCC's Billing and Payment terms and conditions. If full payment is not received on a timely basis, then any license preliminarily granted shall be deemed automatically revoked and shall be void as if never granted. Further, in the event that you breach any of these terms and conditions or any of CCC's Billing and Payment terms and conditions, the license is automatically revoked and shall be void as if never granted. Use of materials as described in a revoked license, as well as any use of the materials beyond the scope of an unrevoked license, may constitute copyright infringement and publisher reserves the right to take any and all action to protect its copyright in the materials.

### Copyright Notice: Disclaimer

Must include the following copyright and permission notice in connection with any reproduction of the licensed material: "© Georg Thieme Verlag KG."

### Warranties: None

Publisher makes no representations or warranties with respect to the licensed material and adopts on its own behalf the limitations and disclaimers established by CCC on its behalf in its Billing and Payment terms and conditions for this licensing transaction.

**Indemnity**

You hereby indemnify and agree to hold harmless publisher and CCC, and their respective officers, directors, employees and agents, from and against any and all claims arising out of your use of the licensed material other than as specifically authorized pursuant to this license.

**No Transfer of License**

This license is personal to you, but may be assigned or transferred by you to a business associate (or to your employer) if you give prompt written notice of the assignment or transfer to the publisher. No such assignment or transfer shall relieve you of the obligation to pay the designated license fee on a timely basis (although payment by the identified assignee can fulfill your obligation).

**No Amendment Except in Writing**

This license may not be amended except in a writing signed by both parties (or, in the case of publisher, by CCC on publisher's behalf).

**Objection to Contrary Terms**

Publisher hereby objects to any terms contained in any purchase order, acknowledgment, check endorsement or other writing prepared by you, which terms are inconsistent with these terms and conditions or CCC's Billing and Payment terms and conditions. These terms and conditions, together with CCC's Billing and Payment terms and conditions (which are incorporated herein), comprise the entire agreement between you and publisher (and CCC) concerning this licensing transaction. In the event of any conflict between your obligations established by these terms and conditions and those established by CCC's Billing and Payment terms and conditions, these terms and conditions shall control.

**Jurisdiction:**

This license transaction shall be governed by and construed in accordance with the laws of the Federal Republic of Germany. You hereby agree to submit to the jurisdiction of the federal and state courts located in Berlin, Germany for purposes of resolving any disputes that may arise in connection with this licensing transaction.

**Special Terms:**

v 1.4

Questions? [customercare@copyright.com](mailto:customercare@copyright.com) or +1-855-239-3415 (toll free in the US) or +1-978-646-2777.

---

---
