# Supplementary material for: An approach to structural facial rejuvenation with fillers in women
Source: PubMed Central journal article supplement — Int J Womens Dermatol. 2018 Dec 13;5(1):52–67. doi: 10.1016/j.ijwd.2018.08.011 (PMC6374711; doi:10.1016/j.ijwd.2018.08.011), 2018-12-13

The PHI (Personal Health Information) contained in the fac is CONFIDENTIAL. It is intended for the exclusive use of the addressee. It is to be used only to aid in providing specific healthcare services to this patient. Any other use is a violation of Federal Law (HIPPA) and will be reported as such.

COMMENTS:

NUMBER OF PAGES INCLUDING COVER SHEET: 2

FAX:

FROM: Via faxes

FAX: 323 414-1833

DEPT:

TO: Robena Fitzgerald MD

DATE: 8-21-18

**FAX COVER SHEET**

Vai Lambros, M.D.  
360 San Miguel, Suite 406  
Newport Beach, CA 92660  
(949) 759-4733  
F(949) 759-5458

I own the copyright to this image and with this writing grant permission for reproduction of the figure published as Figure 1 in Plastic and Reconstructive Surgery-Three-Dimensional Facial Averaging: A Tool for Understanding Facial Aging Val Lambros and Gideon Amos in the following publication:

Title: An Approach to Structural Rejuvenation with Fillers in Women

Publisher: Elsevier

Author: Rebecca Fitzgerald MD

Expected publication date: Dec 2018

Thank you,

Val Lambros



Supplement: mmc8.pdf [file mmc8.pdf]
