# Supplementary material for: An approach to structural facial rejuvenation with fillers in women
Source: PubMed Central journal article supplement — Int J Womens Dermatol. 2018 Dec 13;5(1):52–67. doi: 10.1016/j.ijwd.2018.08.011 (PMC6374711; doi:10.1016/j.ijwd.2018.08.011), 2018-12-13
Supplement: mmc12.pdf [file mmc12.pdf]

**Photo/Video Consent**

I understand that photographs will be taken periodically throughout my treatments to monitor progress and other factors. I hereby give my consent to Rebecca Fitzgerald, MD, Inc to use these photos and/or video in the following capacities (please check boxes):

| Yes | No | DESCRIPTION                                                                                                                                                                                  |
|-----|----|----------------------------------------------------------------------------------------------------------------------------------------------------------------------------------------------|
| ✓   |    | <b>EDUCATIONAL</b> (medical journals/textbooks; lectures; published articles; etc; to advance the field of aesthetic medicine)                                                               |
|     | ✓  | <b>IN-OFFICE MARKETING</b> (promotional material in the office; office DVD reel; office books; office signage; office brochures; newsletters; etc; to educate our patients about treatments) |
| ✓   |    | <b>OUTSIDE MARKETING</b> (television segments; printed articles; any outside office marketing; etc; excluding on-line marketing; to educate the public about treatments)                     |
| ✓   |    | <b>NEW BEAUTY MAGAZINE</b> (plus any of its' online affiliate websites)                                                                                                                      |

**Special Terms** (please initial if you request any of the below):

- \_\_\_\_\_ Please crop eyes out
- JS First name may not be used
- JS Age may not be used
- \_\_\_\_\_ Other: \_\_\_\_\_

I hereby release Rebecca Fitzgerald, MD, Inc and her agents from any and all claims and demands arising out of, or in conjunction with, the use of the photographs/video. Rebecca Fitzgerald, MD need not approach me again for authorization of the use of these photographs or videos. I am of legal age. I have read the forgoing fully and understand its contents.

Julia M. Dalton  
Print Full Name

Ariana LaFrance  
Witness Full Name

Julia M. Dalton  
Patient Signature

[Signature]  
Witness Signature

1-12-16  
Date Signed

1-12-16  
Date Signed
