# Supplementary material for: An approach to structural facial rejuvenation with fillers in women
Source: PubMed Central journal article supplement — Int J Womens Dermatol. 2018 Dec 13;5(1):52–67. doi: 10.1016/j.ijwd.2018.08.011 (PMC6374711; doi:10.1016/j.ijwd.2018.08.011), 2018-12-13
Supplement: mmc15.pdf [file mmc15.pdf]

## Photo/Video Consent

I understand that photographs will be taken periodically throughout my treatments to monitor progress and other factors. I hereby give my consent to Rebecca Fitzgerald, MD, Inc to use these photos and/or video in the following capacities (please check boxes):

| Yes                                 | No                                  | DESCRIPTION                                                                                                                                                                                  |
|-------------------------------------|-------------------------------------|----------------------------------------------------------------------------------------------------------------------------------------------------------------------------------------------|
| <input checked="" type="checkbox"/> | <input type="checkbox"/>            | <b>EDUCATIONAL</b> (medical journals/textbooks; lectures; published articles; etc; to advance the field of aesthetic medicine)                                                               |
| <input type="checkbox"/>            | <input checked="" type="checkbox"/> | <b>IN-OFFICE MARKETING</b> (promotional material in the office; office DVD reel; office books; office signage; office brochures; newsletters; etc; to educate our patients about treatments) |
| <input type="checkbox"/>            | <input checked="" type="checkbox"/> | <b>OUT OF OFFICE MARKETING</b> (television segments; printed articles; any outside office marketing; etc; excluding on-line marketing; to educate the public about treatments)               |
| <input checked="" type="checkbox"/> | <input type="checkbox"/>            | <b>ON-LINE</b> (website; social media pages; review websites; office e-newsletters; etc; to educate the public about treatments) <i>public education</i>                                     |

I hereby release Rebecca Fitzgerald, MD, Inc and her agents from any and all claims and demands arising out of, or in conjunction with, the use of the photographs/video. Rebecca Fitzgerald, MD need not approach me again for authorization of the use of these photographs or videos. I am of legal age. I have read the forgoing fully and understand its contents.

Stephane Gulbransen  
Print Full Name

Emily Mullins  
Witness Full Name

Stephane Gulbransen  
Patient Signature

EMullin  
Witness Signature

4/6/11  
Date Signed

9/6/2011  
Date Signed
